# Supplementary material for: Fully human antibody VH domains to generate mono and bispecific CAR to target solid tumors
Source: HighWire-hosted journal article supplement (doi:10.1136/jitc-2020-002173), 2021-04-01

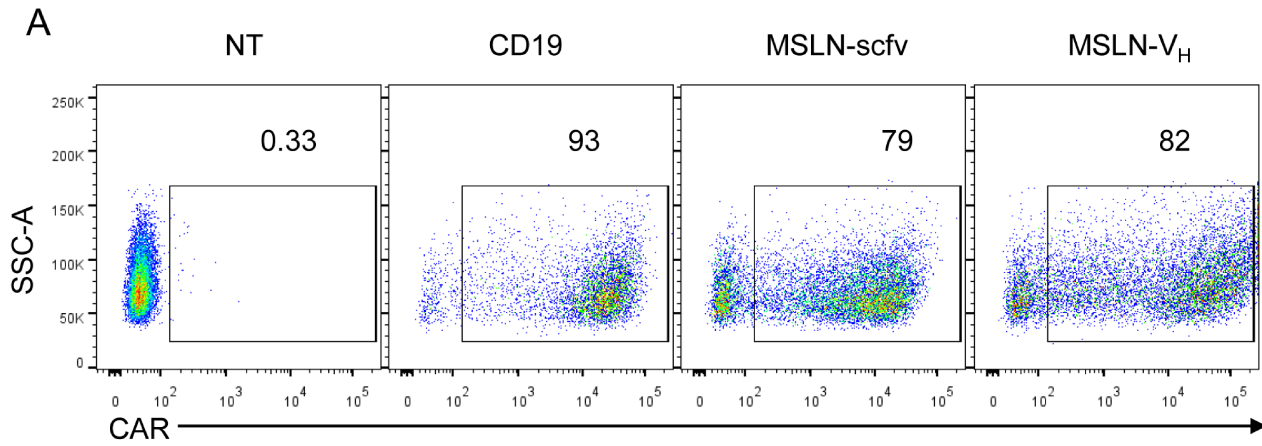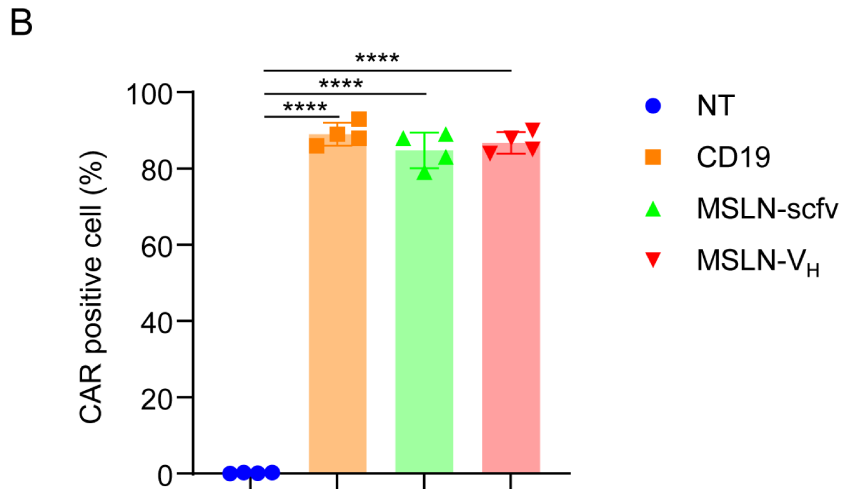

Supplement: jitc-2020-002173supp002_data_supplement.pdf [file jitc-2020-002173supp002_data_supplement.pdf]
